# Supplementary material for: MicroRNA and circular RNA profiling in the deposited fat tissue of Sunite sheep
Source: Front Vet Sci. 2022 Nov 4;9:954882. doi: 10.3389/fvets.2022.954882 (PMC9672515; doi:10.3389/fvets.2022.954882)
Supplement: Supplementary Table S1 — qRT-PCR primer sequences. [file Table_1.XLSX]

## Sheet: Sheet1
Supplementary Table S1. qRT-PCR primer sequences.
Name	Forward primer	Reverse primer
oar-let-7i	CGCTGAGGTAGTAGTTTGTGCTGTT	Universal primer*
oar-miR-16b_R+3	CGTAGCAGCACGTAAATATTGGGGT	Universal primer*
oar-miR-29a	CGCTAGCACCATCTGAAATCGGTT	Universal primer*
oar-miR-543-3p	CCAAACATTCGCGGTGCACTTCTTT	Universal primer*
oar-miR-23b_R+4_2	CGATCACATTGCCAGGGATTTCCA	Universal primer*
oar-miR-27a_R-1	TGCTTCACAGTGGCTAAGTTCCG	Universal primer*
U6	GGAACGATACAGAGAAGATTAGC	TGGAACGCTTCACGAATTTGCG
GAPDH	CGGCACAGTCAAGGCAGAGAAC	CACGTACTCAGCACCAGCATCAC
circRNA1502	CGCCGTACATTGCTTCAGGC	TTCCGCAAACCCAAAGACGG
circRNA2616	GGCGATGTTGCTTCCGTGTAT	CCTCCACATGAGTGTTAAACGCC
circRNA4025	GGGTCTTGCAAGGATCGGCT	AGGTTGCTTTTATGTGGCTTGTCTT
circRNA4842	TGCTGAAGATGGTGAAGGAGCT	TCTTGACCTTTTCTTTCTCCTTGCA
circRNA5519	CGTTCACCATTCTCAACCTGGC	TGGTTGCCAAGAGGTCTGGT
circRNA6418	AGAGTTCTCGTGAGCACAAAGC	CAGTTCAGCAGAAATGTCCGGA
circRNA8400	TGGGCTCTCATATCAGAGGACAC	CATTCAGCCTCTGGATGCGC
circRNA8546	GATCCCCGCTCAACGCTTTG	AGACGGCGGTGGAGTTTTCA
* The Universal primer was provided by the manufacture.
