# Supplementary material for: MicroRNA and circular RNA profiling in the deposited fat tissue of Sunite sheep
Source: Front Vet Sci. 2022 Nov 4;9:954882. doi: 10.3389/fvets.2022.954882 (PMC9672515; doi:10.3389/fvets.2022.954882)
Supplement: Supplementary Table S2 — The differentially expressed miRNA. [file Table_2.XLSX]

## Sheet: 30M vs 6M
Supplementary Table S2. The differentially expressed miRNA.
miR_name	miR_seq	up/down	fold_change(group3(mean)/group1(mean))	log2(fold_change)	pvalue(t_test)
oar-miR-543-3p	AAACATTCGCGGTGCACTTCTTT	down	0.226743	-2.14087	0.000524428
chi-miR-2483-5p_L+2R-2	TCCGTCAACCATCCAGCTGTTT	up	1.82065	0.864457	0.000828495
oar-miR-323c	CACAATACACGGTCGGCCTCT	down	0.0572845	-4.12571	0.00268086
mmu-miR-299b-3p_R+4	TATGTGGGACGGTAAACCGCTT	down	0.301969	-1.72753	0.00299036
cja-miR-299_R+2	TATGTGGGACGGTAAACCGCTT	down	0.301969	-1.72753	0.00299036
PC-5p-72183_36	GCGGCGGGCGCGTCGGTC	down	1.62846e-05	-15.9061	0.00299483
oar-miR-29a	TAGCACCATCTGAAATCGGTT	up	2.04694	1.03347	0.00337434
chi-miR-223-3p	TGTCAGTTTGTCAAATACCCCA	down	0.343072	-1.54342	0.0035739
oar-miR-758-3p_R+1	TTTGTGACCTGGTCCACTAAC	down	0.226829	-2.14032	0.00402788
oar-miR-376b-3p_R+1	ATCATAGAGGAAAATCCATGTT	down	0.0723766	-3.78833	0.00418831
oar-miR-376d	ATCATAGAGGAAAATCCACAT	down	4.09314e-06	-17.8984	0.00499247
oar-let-7b_R+1	TGAGGTAGTAGGTTGTGTGGTT	up	1.19492	0.256913	0.00501349
PC-5p-17439_594	TAGAAAGTTTCTTTGGGGTTTT	up	2.63132	1.39579	0.00531498
oar-miR-494-3p	TGAAACATACACGGGAAACCTCT	down	0.32199	-1.63491	0.00552998
oar-miR-411b-3p_1ss6CA	TATGTAACATGGTCCACTAAT	down	0.188169	-2.4099	0.00570733
bta-miR-24-3p_R-2	TGGCTCAGTTCAGCAGGAAC	up	1.56029	0.641814	0.0057506
chi-miR-24-3p	TGGCTCAGTTCAGCAGGAAC	up	1.56029	0.641814	0.0057506
chi-miR-30d-3p_L+1	CTTTCAGTCAGATGTTTGCTGC	up	1.68611	0.753702	0.0057918
oar-miR-299-3p_R-1_2ss19AG21AT	TATGTGGGACGGTAAACCGCT	down	0.223044	-2.1646	0.00623807
cli-miR-146b-5p_R-1_1ss21CT	TGAGAACTGAATTCCATAGGTAT	up	1.99812	0.998645	0.00652867
cgr-miR-196b_R+1	TAGGTAGTTTCCTGTTGTTGGGT	up	1.36024	0.443858	0.00670553
bta-mir-2285u-p3_1ss1AG	GACCCGAACGAACTTTTTGGCT	up	9.74892	3.28524	0.00688033
hsa-miR-151b_R+4	TCGAGGAGCTCACAGTCTAGCA	down	0.351961	-1.50651	0.00724986
cja-miR-151_R+2	TCGAGGAGCTCACAGTCTAGCA	down	0.351961	-1.50651	0.00724986
oar-miR-23b_R+4_2	ATCACATTGCCAGGGATTTCCA	up	1.6222	0.69795	0.00790752
oar-miR-23b_R+4_1	ATCACATTGCCAGGGATTACCA	up	1.6222	0.69795	0.00790752
oar-miR-381-3p_L-1R+2_1ss5AG	TATGCAAGGGCAAGCTCTCTGT	down	0.319805	-1.64474	0.00816389
oar-miR-3959-3p	TGTATGTCAACTGATCCACAGT	down	0.174383	-2.51967	0.00857268
bta-mir-2285bz-p3_1ss19TC	AAAACTTGAATGAACTTTCTGG	up	110024	16.7475	0.00867698
chi-miR-1271-5p_R+2	CTTGGCACCTAGTAAGTACTCA	up	1.56558	0.646701	0.00873879
oar-miR-493-3p	TGAAGGTCTACTGTGTGCCAGG	down	0.26147	-1.93528	0.00885171
oar-miR-134-5p_R+1	TGTGACTGGTTGACCAGAGGGA	down	0.221917	-2.17191	0.00920855
PC-3p-90484_16	CCCCGCCCGCGCCGCCCCGCCG	down	1.20686e-05	-16.3384	0.00989472
chi-miR-365-3p	TAATGCCCCTAAAAATCCTTAT	up	1.1079	0.147823	0.0114925
bta-miR-365-3p	TAATGCCCCTAAAAATCCTTAT	up	1.1079	0.147823	0.0114925
oar-miR-410-3p	AATATAACACAGATGGCCTGT	down	0.214192	-2.22302	0.0131799
chi-miR-656	AATATTATACAGTCAACCTCT	down	0.0864888	-3.53134	0.0132689
oar-miR-665-3p	ACCAGTAGGCCGAGGCCCCTCA	down	0.161367	-2.63159	0.0134168
pal-miR-9226-5p_L-3_1ss5GA	AATCCCTGTTCGGGCGCCA	down	2.18446e-05	-15.4824	0.0143786
chi-miR-20b	CAAAGTGCTCACAGTGCAGGTAG	down	0.49194	-1.02345	0.0144553
chi-miR-151-3p	CTAGACTGAAGCTCCTTGAGG	up	1.16295	0.217788	0.0156323
xtr-miR-148a_R+2	TCAGTGCACTACAGAACTTTGTTA	down	0.503865	-0.98889	0.0162551
oar-miR-493-5p	TTGTACATGGTAGGCTTTCATT	down	0.295117	-1.76064	0.0173058
bta-mir-2285n-3-p3_1ss19GT	AAACCCGAATGAACTTTTTGGA	up	1.97484	0.981732	0.018117
chi-miR-27b-3p	TTCACAGTGGCTAAGTTCTGC	up	1.51495	0.599269	0.01815
pal-miR-9993b-3p_L+2	ATATCTCGCTGGGGCCTCCA	down	0.125881	-2.98987	0.0185483
oar-miR-380-3p	TATGTAATGTGGTCCACGTCT	down	0.365157	-1.45341	0.0187021
oar-miR-495-3p	AAACAAACATGGTGCACTTCTT	down	0.382741	-1.38556	0.0201224
oar-miR-411b-5p	TGGTCGACCATAAAACGTACGT	down	0.404541	-1.30564	0.0203954
oar-miR-299-5p	TGGTTTACCGTCCCACATACAT	down	0.31141	-1.68311	0.0224142
hsa-miR-365b-5p_L+1	GAGGGACTTTCAGGGGCAGCTGT	down	0.656711	-0.606669	0.0240089
oar-miR-485-3p	GTCATACACGGCTCTCCTCTCT	down	0.299556	-1.7391	0.024393
bta-miR-194b	CACATGGAGTTGCTGTTACA	up	7.16602	2.84117	0.0255602
bta-mir-2285r-p3_1ss3GA	TGAATGAACTTTTTGGCCAACC	down	0.000101416	-13.2674	0.0259722
bta-mir-2285f-2-p3_1ss21TC	TGAATGAACTTTTTGGCCAACC	down	0.000101416	-13.2674	0.0259722
bta-mir-2285t-p3_1ss3GA	TGAATGAACTTTTTGGCCAACC	down	0.000101416	-13.2674	0.0259722
hsa-miR-1260a_L+1_1ss10TG_2	CATCCCACCGCTGCCACCA	down	0.164989	-2.59955	0.0261331
hsa-miR-1260a_L+1_1ss10TG_1	AATCCCACCGCTGCCACCA	down	0.164989	-2.59955	0.0261331
cgr-miR-1260_L+1_1	AATCCCACCGCTGCCACCA	down	0.164989	-2.59955	0.0261331
oan-miR-103-3p_R+2	AGCAGCATTGTACAGGGCTATGAGT	down	0.638829	-0.646498	0.026908
chi-miR-1307-3p	ACTCGGCGTGGCGTCGGTCGTGG	down	0.617318	-0.695915	0.0280314
oar-miR-495-5p_L-1	GAAGTCGCCCATGTTCTTTTCG	down	0.0924255	-3.43557	0.0281276
pma-miR-23b_R+1_1ss23CT	ATCACATTGCCAGGGATTACCATT	up	1.60331	0.68105	0.0286355
oan-miR-1386	CTCCTGGCTGGCTCGCCA	down	0.351295	-1.50925	0.0287366
oar-miR-3955-5p	TTTGATGGCTGATCCTCTCACT	down	0.209269	-2.25657	0.0287422
bta-miR-2478_L+1	CGTATCCCACTTCTGACACCA	down	0.333407	-1.58464	0.0291869
chi-let-7e-5p	TGAGGTAGGAGGTTGTATAGTT	up	1.5117	0.596175	0.0292966
oar-miR-27a_R-1	TTCACAGTGGCTAAGTTCCG	up	1.51434	0.59869	0.02955
hsa-miR-24-2-5p_L+1R-1	GTGCCTACTGAGCTGAAACACA	up	1.67333	0.742725	0.0296026
chi-mir-328-p5	TGTTTCGGAGCCTGGAGCG	up	10.4768	3.38913	0.0309512
bta-miR-2285bf_1ss20TC	AAAACACGAACAAACTTTTCG	up	1.3192	0.399661	0.0310617
pal-miR-9993b-3p	ATCTCGCTGGGGCCTCCA	down	0.325155	-1.6208	0.0316592
chi-miR-101-5p	TCAGTTATCACAGTGCTGATGC	up	3.36909	1.75236	0.0320018
mmu-miR-300-3p_R-2	TATGCAAGGGCAAGCTCTCT	down	0.476473	-1.06953	0.0320036
cgr-miR-1260_L+1R+1	AATCCCACCGCTGCCACCAT	down	0.186784	-2.42055	0.0323659
bta-miR-193a-5p	TGGGTCTTTGCGGGCGAGATGA	down	0.724423	-0.465095	0.0331241
bta-miR-2285cj_L+1R-1_1ss8GA	AAAAACTAGAATGAACTTTTTG	up	8.18474	3.03294	0.0336115
chi-miR-582-5p_L+1R-1	TTACAGTTGTTCAACCAGTTAC	up	1.66918	0.739144	0.0351343
oar-miR-3957-3p	ACGCACAGCACCTCACTGAGCT	down	2.22093e-05	-15.4585	0.0358724
hsa-miR-7977_1ss6AG	TTCCCGGCCAACGCACCA	down	0.366854	-1.44672	0.0360071
oar-miR-3958-3p	AGATATTGCACGGTTGATCTCT	down	0.391753	-1.35198	0.0367301
chi-miR-146a	TGAGAACTGAATTCCATAGGTT	up	1.80784	0.854271	0.0367514
oar-miR-382-5p	GAAGTTGTTCGTGGTGGATTCG	down	0.348168	-1.52214	0.0375488
oar-miR-376c-3p	AACATAGAGGAAATTCCACGT	down	0.457694	-1.12755	0.0384157
mmu-miR-345-3p_L+1R-1	CCCTGAACTAGGGGTCTGGAGA	down	0.589395	-0.762694	0.0387699
bta-miR-2411-3p_L-6_1ss25CT	CTGTCTTACTCCCACATCT	down	0.207306	-2.27017	0.0406531
oar-miR-487a-3p_L+1R-1	AATCATACAGGGACATCCAGTT	down	0.0900241	-3.47355	0.0407325
oar-miR-369-3p	AATAATACATGGTTGATCTTT	down	0.288673	-1.79249	0.041397
oar-miR-370-3p_R-2	GCCTGCTGGGGTGGAACCTGGT	down	0.172545	-2.53495	0.041678
oar-let-7i	TGAGGTAGTAGTTTGTGCTGTT	up	1.39846	0.483838	0.0418509
bta-mir-2285m-3-p5_1ss1AG	GAAAGGTTCATTTGGGTTTTT	up	1.90957	0.933251	0.0418768
chi-miR-34a_R+1	TGGCAGTGTCTTAGCTGGTTGTT	up	1.70683	0.771322	0.0419915
mmu-miR-3968_L-2_1ss14AT	AATCCCACTCCTGACACCA	down	0.468416	-1.09414	0.0422316
hsa-miR-129-1-3p	AAGCCCTTACCCCAAAAAGTAT	up	2.99472	1.58242	0.0424881
chi-miR-223-5p	TGTGTATTTGACAAGCTGAGTTG	down	0.338674	-1.56203	0.0427734
oar-miR-154b-5p	AGAGGTCTTCCATGGTGCATTCG	down	0.263825	-1.92234	0.0427933
efu-miR-9226_L-1_2ss4AT22GA	CATGTCCCTGTTCGGGCGCCA	down	0.395927	-1.33669	0.0428241
bta-miR-10172-3p	TCACTGGGCATCCTCTGCTTTA	down	0.111709	-3.16219	0.0428566
bta-miR-2478_L+2	TCGTATCCCACTTCTGACACCA	down	0.32025	-1.64273	0.0438053
bta-mir-2285cj-p5	AAAAGTTCGTTTGGGTTTTTC	up	2.04684	1.0334	0.0444353
bta-miR-2285aj-5p_L-2R+1	AAAAGTTCGTTTGGGTTTTTC	up	2.04684	1.0334	0.0444353
chi-miR-490	CAACCTGGAGGACTCCATGCTGT	up	5.30052	2.40614	0.0450186
PC-5p-1101_6136	CGTTTCCCGGCCCATGCACCA	down	0.184063	-2.44173	0.0451575
bta-miR-2387_R+1	TGGAAGGCCTGGCTTTGCAGCGT	down	0.625876	-0.676052	0.0452029
mmu-miR-5126_L-1R-2_1ss18CT	CGGGCGGGGCCGGGGGTGG	down	0.106788	-3.22717	0.0465106
aca-miR-29b_R+1_1ss21GC	TAGCACCATTTGAAATCAGTCC	up	2.13565	1.09468	0.0477488
oar-miR-432_1ss23GT	TCTTGGAGTAGGTCATTGGGTGT	down	0.256515	-1.96288	0.0478206
chi-miR-1343	CTCCTGGGGCCCGCACTCTCGC	down	0.852549	-0.230145	0.0482115
bta-miR-744_R-1	TGCGGGGCTAGGGCTAACAGC	up	1.38017	0.46485	0.0484089
oar-miR-539-3p	AATCATACAAGGACAATTTCTTT	down	0.265612	-1.91261	0.0486475

## Sheet: 30M vs 18M
Supplementary Table S2. The differentially expressed miRNA.
miR_name	miR_seq	up/down	fold_change(group3(mean)/group2(mean))	log2(fold_change)	pvalue(t_test)
oar-miR-376e-3p	AACATAGAGGAAAATCCACATT	down	0.473279	-1.07924	0.00160512
hsa-miR-139-3p	TGGAGACGCGGCCCTGTTGGAGT	up	1.48429	0.56977	0.0022248
eca-miR-139-3p_L+1	TGGAGACGCGGCCCTGTTGGAGT	up	1.48429	0.56977	0.0022248
bta-miR-503-5p_R+3	TAGCAGCGGGAACAGTACTGCAG	down	0.0470878	-4.4085	0.00292895
oar-miR-493-3p	TGAAGGTCTACTGTGTGCCAGG	down	0.460269	-1.11945	0.00542412
PC-5p-68861_41	GGTCCTGTGTGAATTAACA	down	1.54611e-05	-15.981	0.00819791
oar-let-7c	TGAGGTAGTAGGTTGTATGGTT	up	1.18901	0.249763	0.00889285
oar-miR-655-3p	ATAATACATGGTTAACCTCTCT	down	0.506671	-0.980878	0.00943371
chi-miR-1271-5p_R+2	CTTGGCACCTAGTAAGTACTCA	up	1.36018	0.443801	0.00967612
tgu-miR-16b-5p_L+1R+1	CTAGCAGCACGTAAATATTGGAGA	up	1.9032	0.928424	0.00970369
gga-miR-22-3p_1ss22TC	AAGCTGCCAGTTGAAGAACTGC	down	0.660547	-0.598268	0.0110767
chi-let-7i-3p	CTGCGCAAGCTACTGCCTTGCT	down	0.660768	-0.597784	0.0117578
oar-miR-16b_R+3	TAGCAGCACGTAAATATTGGGGT	up	1.37659	0.461104	0.0124694
bta-miR-199c_L-1R+2_2	ACAGTAGTCTGCACATTGGCT	down	0.319956	-1.64405	0.012911
bta-miR-199c_L-1R+2_1	ACAGTAGTCTGCACATTGGCA	down	0.319956	-1.64405	0.012911
mdo-miR-152-3p_R+3	TCAGTGCATGACAGAACTTGGGTTT	up	2.81075	1.49095	0.0129132
chi-miR-33a-5p	GTGCATTGTAGTTGCATTGC	down	0.240849	-2.0538	0.0134321
chi-let-7e-5p	TGAGGTAGGAGGTTGTATAGTT	up	1.6996	0.765194	0.0144358
oar-miR-411a-5p	ATAGTAGACCGTATAGCGTACG	down	0.565588	-0.822177	0.0167769
cin-miR-4171-5p_R-2_1ss15AT	TGACTCTCTTAAGGTAGC	down	0.159356	-2.64968	0.0171861
oar-miR-493-5p	TTGTACATGGTAGGCTTTCATT	down	0.585001	-0.77349	0.0177874
oar-miR-199a-3p	ACAGTAGTCTGCACATTGGTT	down	0.667128	-0.583964	0.0180655
chi-miR-16a-5p	TAGCAGCACGTAAATATTGGAG	up	1.21101	0.276207	0.0194564
oar-let-7b_R+1	TGAGGTAGTAGGTTGTGTGGTT	up	1.11347	0.15506	0.0205019
oar-miR-136_R-1	ACTCCATTTGTTTTGATGATGG	down	0.391607	-1.35252	0.0205802
chi-miR-99b-5p	CACCCGTAGAACCGACCTTGCG	up	1.69634	0.762426	0.0210193
PC-3p-43105_133	CTCTCCTCCCGCCCTTCCC	down	0.278545	-1.84402	0.0218387
ssc-miR-339_L-2R+1	CCTGTCCTCCAGGAGCTCAT	down	0.153594	-2.70281	0.021935
oar-miR-369-5p	AGATCGACCGTGTTATATTCG	down	0.482808	-1.05048	0.0222449
bta-miR-744_R-1	TGCGGGGCTAGGGCTAACAGC	up	1.80817	0.854531	0.0222606
chi-miR-25-5p	AGGCGGAGACTTGGGCAATTGCT	up	1.41208	0.497826	0.0223828
hsa-miR-1260a_L+1_1ss10TG_2	CATCCCACCGCTGCCACCA	down	0.152496	-2.71316	0.0237262
hsa-miR-1260a_L+1_1ss10TG_1	AATCCCACCGCTGCCACCA	down	0.152496	-2.71316	0.0237262
cgr-miR-1260_L+1_1	AATCCCACCGCTGCCACCA	down	0.152496	-2.71316	0.0237262
chi-miR-502a_1ss11AG	ATGCACCTGGGCAAGGATTC	down	0.585591	-0.772034	0.0243431
bta-miR-2285cj_L+1R-1_1ss8GA	AAAAACTAGAATGAACTTTTTG	up	7.51076	2.90896	0.0243807
oar-miR-3959-3p	TGTATGTCAACTGATCCACAGT	down	0.218552	-2.19395	0.0244363
hsa-miR-574-5p	TGAGTGTGTGTGTGTGAGTGTGT	up	1.2521	0.32435	0.0249176
pma-miR-23b_R+1_1ss23CT	ATCACATTGCCAGGGATTACCATT	up	1.57602	0.656282	0.025403
chi-miR-127-5p_L+2R-1	CTGAAGCTCAGAGGGCTCTGATT	down	0.53697	-0.897086	0.0254714
ssc-mir-4332-p3_1ss16CT_2	GGGCCGGGGGTGGGGTCGGC	down	2.04926e-05	-15.5745	0.0256256
ssc-mir-4332-p5_1ss16CT	GGGCCGGGGGTGGGGTCGGC	down	2.04926e-05	-15.5745	0.0256256
mmu-miR-299b-3p_R+4	TATGTGGGACGGTAAACCGCTT	down	0.466074	-1.10137	0.0258024
cja-miR-299_R+2	TATGTGGGACGGTAAACCGCTT	down	0.466074	-1.10137	0.0258024
oar-miR-30a-3p_R+1	CTTTCAGTCGGATGTTTGCAGC	down	0.5921	-0.756087	0.0258227
chi-miR-378-5p	CTCCTGACTCCAGGTCCTGTGT	down	0.538277	-0.89358	0.0281212
hsa-miR-339-5p_1ss23GC	TCCCTGTCCTCCAGGAGCTCACC	down	0.6084	-0.716909	0.0290436
chi-miR-1343	CTCCTGGGGCCCGCACTCTCGC	up	1.18241	0.24173	0.0294851
chi-miR-20a-3p_R+2	ACTGCATTATGAGCACTTAAAGT	down	0.36666	-1.44748	0.0296908
oar-miR-323c	CACAATACACGGTCGGCCTCT	down	0.158448	-2.65792	0.0299158
oga-miR-100_R+2	AACCCGTAGATCCGAACTTGTGAA	up	1.73684	0.796467	0.0299265
PC-3p-25309_349	AAGGGACCCGAACGAACTTTTT	up	2.21529	1.1475	0.0307667
oar-miR-299-5p	TGGTTTACCGTCCCACATACAT	down	0.615939	-0.699141	0.0325808
bta-miR-2285ce_L-1_1ss13GA	AAAACCTGAATAAACTTTTTGA	down	0.575745	-0.796498	0.032958
oar-miR-299-3p_R-1_2ss19AG21AT	TATGTGGGACGGTAAACCGCT	down	0.381582	-1.38993	0.0333289
gga-miR-3535_L+1_1ss25AG	TGGATATGATGACTGATTATCTGAGA	up	1.86029	0.895531	0.0335905
oar-miR-23b_R+4_2	ATCACATTGCCAGGGATTTCCA	up	1.4244	0.510351	0.0337805
oar-miR-23b_R+4_1	ATCACATTGCCAGGGATTACCA	up	1.4244	0.510351	0.0337805
bta-miR-486	TCCTGTACTGAGCTGCCCCGAG	up	1.23723	0.307119	0.0352466
chi-let-7g-3p_1ss22CT	CTGTACAGGCCACTGCCTTGCT	down	0.660155	-0.599123	0.0357846
chi-miR-93-3p	ACTGCTGAGCCAGCACTTCCCGA	up	1.63291	0.70745	0.0359374
cgr-miR-1260_L+1R+1	AATCCCACCGCTGCCACCAT	down	0.17596	-2.50668	0.0367584
mmr-miR-186	CAAAGAATTCTCTTTTTGGGCT	up	1.35812	0.441606	0.0367971
chi-miR-190b	TGATATGTTTGATATTGGGTTG	up	7.76273	2.95656	0.0370668
chi-miR-223-3p	TGTCAGTTTGTCAAATACCCCA	down	0.65797	-0.603907	0.0371106
hsa-miR-365b-5p_L+1	GAGGGACTTTCAGGGGCAGCTGT	up	1.35784	0.441313	0.0390559
pma-miR-30a-5p_R+1	TGTAAACATCCTCGACTGGAAGCC	down	0.444292	-1.17042	0.0391468
oar-miR-369-3p	AATAATACATGGTTGATCTTT	down	0.478101	-1.06461	0.0406669
oar-miR-3959-5p	GGTTGATCAGAGAACATACATT	down	0.494023	-1.01735	0.0408356
mmu-miR-3968_L-1_1ss14AT	GAATCCCACTCCTGACACCA	down	0.208101	-2.26464	0.0411493
chi-miR-30d-3p_L+1	CTTTCAGTCAGATGTTTGCTGC	up	1.31458	0.394605	0.042165
aca-miR-30c-5p_L+2	AATGTAAACATCCTACACTCTCAGC	down	0.199146	-2.3281	0.0421767
oar-miR-379-5p_R-1	TGGTAGACTATGGAACGTAGG	down	0.622939	-0.682838	0.0432023
oar-miR-30d_R+4	TGTAAACATCCCCGACTGGAAGC	up	1.28633	0.363255	0.043368
bta-miR-139	TCTACAGTGCACGTGTCTCCAGT	up	1.30353	0.382424	0.0441974
eca-miR-139-5p_R+1	TCTACAGTGCACGTGTCTCCAGT	up	1.30353	0.382424	0.0441974
chi-miR-190a-5p	TGATATGTTTGATATATTAGGTT	down	0.715856	-0.482259	0.0448416
bta-mir-2285e-2-p5	AAAAAGTTCGTTTGGGTTTTTC	down	0.598988	-0.739401	0.0451706
bta-miR-129_R-1	CTTTTTGCGGTCTGGGCTTGC	down	0.203671	-2.29569	0.0454401
mmu-miR-29b-1-5p_R+2	GCTGGTTTCATATGGTGGTTTAGA	up	67547.6	16.0436	0.0466196
chi-miR-324-5p	CGCATCCCCTAGGGCATTGGTGT	up	1.53119	0.614654	0.0470085
chi-miR-129-3p	AAGCCCTTACCCCAAAAAGCAT	up	1.4722	0.557977	0.0470253
ssc-mir-4335-p3_1ss2GA	AACCCCACGTTGGGCGCCA	down	1.96262e-05	-15.6369	0.0471419
cgr-miR-1260_L+2	GAATCCCACCGCTGCCACCA	down	0.346236	-1.53017	0.0475332
ssc-miR-7134-3p_1ss7AC	ATGCGGCACCTGCGGATACGG	up	2.01884	1.01353	0.0476718
bta-miR-502a_R-1	AATGCACCTGGGCAAGGATTC	down	0.702871	-0.508667	0.0478065
chi-miR-146b-3p	TGCCCTAGGGACTCAGTTCTGGT	down	0.0897232	-3.47838	0.0494056
chi-miR-2404_R+1	TTGCACTGCATGGTATCTGC	down	0.218169	-2.19648	0.0495158

## Sheet: 18M vs 6M
Supplementary Table S2. The differentially expressed miRNA.
miR_name	miR_seq	up/down	fold_change(group2(mean)/group1(mean))	log2(fold_change)	pvalue(t_test)
bta-miR-199c_L-1R+2_2	ACAGTAGTCTGCACATTGGCT	up	1.75038	0.807671	0.000637972
bta-miR-199c_L-1R+2_1	ACAGTAGTCTGCACATTGGCA	up	1.75038	0.807671	0.000637972
oar-miR-758-3p_R+1	TTTGTGACCTGGTCCACTAAC	down	0.411472	-1.28113	0.000861609
oar-miR-30a-3p_R+1	CTTTCAGTCGGATGTTTGCAGC	up	1.49837	0.58339	0.00271902
bta-miR-193a-5p	TGGGTCTTTGCGGGCGAGATGA	down	0.684949	-0.545932	0.00364577
oar-miR-411b-5p	TGGTCGACCATAAAACGTACGT	down	0.465757	-1.10235	0.00386579
chi-miR-223-3p	TGTCAGTTTGTCAAATACCCCA	down	0.521409	-0.939511	0.00467442
chi-miR-1343	CTCCTGGGGCCCGCACTCTCGC	down	0.721027	-0.471875	0.00629145
oar-miR-323c	CACAATACACGGTCGGCCTCT	down	0.361535	-1.46779	0.00778425
bta-mir-2285e-2-p5	AAAAAGTTCGTTTGGGTTTTTC	up	3.22962	1.69136	0.00778638
oar-miR-494-3p	TGAAACATACACGGGAAACCTCT	down	0.415569	-1.26684	0.00791439
gga-miR-3535_L+1_1ss25AG	TGGATATGATGACTGATTATCTGAGA	down	0.502245	-0.993538	0.0081615
cin-miR-4171-5p_R-2_1ss15AT	TGACTCTCTTAAGGTAGC	up	64678.3	15.981	0.00819791
tgu-miR-16b-5p_L+1R+1	CTAGCAGCACGTAAATATTGGAGA	down	0.621728	-0.685644	0.00864613
PC-3p-25309_349	AAGGGACCCGAACGAACTTTTT	down	0.723598	-0.466739	0.00905746
pma-miR-143-3p_R-3_1ss19CT	TGAGATGAAGCACTGTAAT	up	34446.5	15.0721	0.00976075
PC-3p-13906_774	CCGCTAAGGAGTGTGTAAC	up	1.28721	0.364243	0.00978195
mmu-miR-299b-3p_R+4	TATGTGGGACGGTAAACCGCTT	down	0.647899	-0.626159	0.010023
cja-miR-299_R+2	TATGTGGGACGGTAAACCGCTT	down	0.647899	-0.626159	0.010023
PC-3p-43105_133	CTCTCCTCCCGCCCTTCCC	up	1.73338	0.793589	0.010179
hsa-miR-194-3p_R+1	CCAGTGGGGCTGCTGTTATCTGT	down	0.123575	-3.01654	0.0106413
oar-miR-376c-3p	AACATAGAGGAAATTCCACGT	down	0.72828	-0.457434	0.0119196
oar-miR-30b_R+1	TGTAAACATCCTACACTCAGCT	up	1.40629	0.49189	0.0119718
PC-3p-24731_361	TAATTCCTCTTTTTACCAC	up	27.0358	4.7568	0.0123832
bta-miR-2285bp_1ss19GT	AAAACCAGAACGAACTTTTTGT	up	1.36416	0.448015	0.0128132
chi-miR-34a_R+1	TGGCAGTGTCTTAGCTGGTTGTT	up	1.96201	0.972335	0.0128394
chi-miR-30e-3p_R+1	CTTTCAGTCGGATGTTTACAGT	up	1.22991	0.298548	0.0132905
hsa-miR-365b-5p_L+1	GAGGGACTTTCAGGGGCAGCTGT	down	0.483644	-1.04798	0.0149842
chi-miR-656	AATATTATACAGTCAACCTCT	down	0.168638	-2.56799	0.0166623
oar-miR-16b_R+3	TAGCAGCACGTAAATATTGGGGT	down	0.822179	-0.282476	0.016753
bta-mir-2284aa-3-p3_1ss21GT	AAAATCCGAACGAACTTTTTT	down	1.25477e-05	-16.2822	0.016932
bta-mir-7859-p5	ATGTGAAATTACCAGTATTTGT	down	0.137267	-2.86494	0.0181532
oan-miR-1386_L+1_2	CCTCCTGGCTGGCTCGCCA	down	3.27005e-05	-14.9003	0.0191621
oan-miR-1386_L+1_3	TCTCCTGGCTGGCTCGCCA	down	3.27005e-05	-14.9003	0.0191621
oan-miR-1386_L+1_1	ACTCCTGGCTGGCTCGCCA	down	3.27005e-05	-14.9003	0.0191621
oar-miR-29a	TAGCACCATCTGAAATCGGTT	up	1.91962	0.94082	0.0193863
oar-miR-1197-3p	TAGGACACATGGTCTACTTCT	down	1.01899e-05	-16.5825	0.0206252
bta-miR-11987_L-2_1ss8TA	AGGAAACTCTGGTGGAGGT	up	1.52467	0.608501	0.0216111
oar-miR-22-3p_R+1	AAGCTGCCAGTTGAAGAACTGT	up	1.33382	0.415564	0.0217344
chi-miR-20b	CAAAGTGCTCACAGTGCAGGTAG	down	0.543439	-0.87981	0.0219929
ssc-mir-4332-p5_1ss11CA	CGCCGGGCGCATTTCCACC	up	1.28321	0.359755	0.0230207
bta-mir-2285n-4-p3	TGGAAAAACCCGAATGAACTTT	up	2.41068	1.26944	0.0245324
bta-mir-2285n-5-p3	TGGAAAAACCCGAATGAACTTT	up	2.41068	1.26944	0.0245324
bta-mir-2285r-p3_1ss3GA	TGAATGAACTTTTTGGCCAACC	down	0.000101416	-13.2674	0.0259722
bta-mir-2285f-2-p3_1ss21TC	TGAATGAACTTTTTGGCCAACC	down	0.000101416	-13.2674	0.0259722
bta-mir-2285t-p3_1ss3GA	TGAATGAACTTTTTGGCCAACC	down	0.000101416	-13.2674	0.0259722
cgr-miR-379_R+3	TGGTAGACTATGGAACGTAGGAGT	down	9.05541e-06	-16.7528	0.0263154
oar-miR-381-3p_L-1R+2_1ss5AG	TATGCAAGGGCAAGCTCTCTGT	down	0.593759	-0.75205	0.0270287
oar-miR-299-3p_R-1_2ss19AG21AT	TATGTGGGACGGTAAACCGCT	down	0.584524	-0.774667	0.0275924
oan-miR-103-3p_R+2	AGCAGCATTGTACAGGGCTATGAGT	down	0.52046	-0.942141	0.0277956
PC-3p-65523_48	CGTTTCCTTCCTTTCTTAC	up	6.23879	2.64127	0.0288266
oar-miR-665-3p	ACCAGTAGGCCGAGGCCCCTCA	down	0.479129	-1.06151	0.030218
oar-miR-485-3p	GTCATACACGGCTCTCCTCTCT	down	0.476061	-1.07078	0.0302951
mmu-mir-6240-p3_4	TGTGATTTCTGCCCAGTGCTC	up	1.28726	0.3643	0.0310589
mmu-mir-6240-p3_2	GATTTCTGCCCAGTGCTCT	up	1.28726	0.3643	0.0310589
mmu-mir-6240-p3_1	CGATGTGATTTCTGCCCAGT	up	1.28726	0.3643	0.0310589
mmu-mir-6240-p3_3	GTGATTTCTGCCCAGTGCT	up	1.28726	0.3643	0.0310589
oar-miR-3955-5p	TTTGATGGCTGATCCTCTCACT	down	0.390538	-1.35647	0.0325207
PC-5p-78399_27	GCCGCCCCCGGGGAGCCCG	up	5.24813	2.3918	0.032839
PC-3p-1820_3963	CCTGGCGGAGCGCTGAGAAGA	up	1.3502	0.433169	0.0330327
chi-miR-33a-3p	CAATGTTTCCACAGTGCATCA	down	1.21902e-05	-16.3239	0.0331337
chi-miR-21-3p_R+1	CAACAGCAGTCGATGGGCTGTC	down	0.194661	-2.36096	0.0334406
oar-miR-299-5p	TGGTTTACCGTCCCACATACAT	down	0.505587	-0.98397	0.03434
chi-miR-129-3p	AAGCCCTTACCCCAAAAAGCAT	down	0.457581	-1.1279	0.0344949
oar-miR-410-3p	AATATAACACAGATGGCCTGT	down	0.528598	-0.919757	0.0349894
oar-miR-3957-3p	ACGCACAGCACCTCACTGAGCT	down	2.22093e-05	-15.4585	0.0358724
hsa-miR-32-3p_R-1	CAATTTAGTGTGTGTGATATT	up	1.7365	0.796184	0.0359818
chi-miR-103-3p_R+2	AGCAGCATTGTACAGGGCTATGAAA	down	0.42457	-1.23593	0.0362135
chi-mir-421-p5	TTCGGTGCACATTGTAGGC	up	3.15807	1.65904	0.0374943
hsa-miR-221-5p	ACCTGGCATACAATGTAGATTT	up	1.42753	0.513522	0.0385054
bta-miR-2478_L+1	CGTATCCCACTTCTGACACCA	down	0.536665	-0.897907	0.0396445
oar-miR-493-3p	TGAAGGTCTACTGTGTGCCAGG	down	0.568082	-0.81583	0.0399611
chi-miR-18a-5p	TAAGGTGCATCTAGTGCAGATAG	down	0.798026	-0.325493	0.0410992
oar-miR-376d	ATCATAGAGGAAAATCCACAT	down	0.515536	-0.955855	0.041176
oar-miR-134-5p_R+1	TGTGACTGGTTGACCAGAGGGA	down	0.492542	-1.02168	0.0418887
oar-let-7i	TGAGGTAGTAGTTTGTGCTGTT	up	1.33826	0.420362	0.0436381
oar-miR-493-5p	TTGTACATGGTAGGCTTTCATT	down	0.504474	-0.987149	0.0451168
hsa-miR-32-5p_R-1	TATTGCACATTACTAAGTTGC	up	1.33113	0.41265	0.0456803
aca-miR-191-5p_L+1R-1	ACAACGGAATCCCAAAAGCAGCT	down	0.491341	-1.0252	0.0461139
chi-miR-199a-5p	CCCAGTGTTCAGACTACCTGTTC	up	1.23279	0.301929	0.0463981
pal-miR-339b-5p_R+2	TCCCTGTCCTCCAGGAGCTTT	up	1.59428	0.672908	0.0465672
chi-miR-146b-3p	TGCCCTAGGGACTCAGTTCTGGT	up	7.90816	2.98334	0.0481023
chi-miR-1307-5p_R+6	TCGACCGGACCTCGACCGGCTCT	up	1.37064	0.454851	0.0483422
chi-miR-223-5p	TGTGTATTTGACAAGCTGAGTTG	down	0.401254	-1.31741	0.0483648
bta-miR-92b_L-1R+1	ATTGCACTCGTCCCGGCCTCCT	up	3.79842	1.9254	0.0489062
oar-miR-380-3p	TATGTAATGTGGTCCACGTCT	down	0.578186	-0.790396	0.0492002
mmu-mir-6240-p5_4	GTGATTTCTGCCCAGTGCTCT	up	1.47816	0.563802	0.049438
mmu-mir-6240-p5_3	ATTTCTGCCCAGTGCTCTGA	up	1.47816	0.563802	0.049438
mmu-mir-6240-p5_5	TGTGATTTCTGCCCAGTGCT	up	1.47816	0.563802	0.049438
mmu-mir-6240-p5_2	ATTTCTGCCCAGTGCTCTG	up	1.47816	0.563802	0.049438
mmu-mir-6240-p5_1	ATGTGATTTCTGCCCAGTGC	up	1.47816	0.563802	0.049438
bta-miR-24-3p_R-2	TGGCTCAGTTCAGCAGGAAC	up	1.32636	0.407469	0.0495561
chi-miR-24-3p	TGGCTCAGTTCAGCAGGAAC	up	1.32636	0.407469	0.0495561
oar-miR-543-3p	AAACATTCGCGGTGCACTTCTTT	down	0.573894	-0.801144	0.0497178
mmu-mir-6236-p3_1ss9AG	CCATACCCGGCCGTCGCC	up	1.49286	0.578075	0.0498967
