# Supplementary material for: MicroRNA and circular RNA profiling in the deposited fat tissue of Sunite sheep
Source: Front Vet Sci. 2022 Nov 4;9:954882. doi: 10.3389/fvets.2022.954882 (PMC9672515; doi:10.3389/fvets.2022.954882)
Supplement: Supplementary Table S3 — The differentially expressed circRNA. [file Table_3.XLSX]

## Sheet: 30M vs 6M
Supplementary Table S3. The differentially expressed circRNA.
Accession	log2FoldChange	regulation	pvalue	hosting gene name
circRNA9004	20.703	up	6.88338e-08	ENSOARG00000019672
circRNA504	-20.4516	down	5.23853e-06	ABCA9
circRNA1793	-19.8455	down	3.23658e-05	DENND4A
circRNA8835	19.8353	up	3.34974e-05	SIPA1L2
circRNA8400	19.6819	up	4.99047e-05	KDM5B
circRNA4947	-20.243	down	0.000513886	GTF2I
circRNA2013	-18.9049	down	0.000754822	ABCG2
circRNA3358	-2.48577	down	0.00270737	RLF
circRNA1671	-18.6161	down	0.00305363	CDKAL1
circRNA11781	18.8485	up	0.00387448	STAC
circRNA15078	19.74	up	0.00415984	VAV3
circRNA4842	2.91299	up	0.00552406	STRN3
circRNA10766	18.927	up	0.00612566	GAK
circRNA13339	18.8616	up	0.00739663	OSBPL1A
circRNA5056	3.68032	up	0.00810261	OSBPL1A
circRNA2807	-3.20638	down	0.00810554	ITPR2
circRNA3511	1.6619	up	0.00857874	VPS72
circRNA2824	2.65897	up	0.00886906	ENSOARG00000020470
circRNA9325	18.9608	up	0.00915157	PEX13
circRNA1784	-2.47908	down	0.00936785	SERINC5
circRNA3360	-18.5244	down	0.0100367	SCMH1
circRNA8056	3.26859	up	0.0103857	FILIP1L
circRNA2813	2.81379	up	0.0104886	SOX5
circRNA4175	4.22274	up	0.011788	ATRX
circRNA13139	19.1075	up	0.0133727	PHKB
circRNA224	-18.1351	down	0.0134141	C1orf116
circRNA3449	-3.10449	down	0.0146406	EVI5
circRNA9778	19.0106	up	0.0148991	CCDC14
circRNA382	-1.88718	down	0.0149036	ACACA
circRNA1231	1.87495	up	0.0150576	FANCM
circRNA3093	-18.1662	down	0.0155531	PMS1
circRNA7402	3.33197	up	0.016824	HERC3
circRNA6418	3.15389	up	0.0170764	PREX2
circRNA9871	18.6219	up	0.0178825	PREX2
circRNA3136	-2.29696	down	0.0180887	UBR3
circRNA9695	18.7818	up	0.0182985	ZNF644
circRNA3143	-3.52336	down	0.0188116	STK39
circRNA4025	1.7102	up	0.0188258	REV3L
circRNA1700	2.10752	up	0.0202701	ENSOARG00000004148
circRNA8701	18.3961	up	0.0206068	RBMS3
circRNA8942	18.9552	up	0.0210999	ADGRF5
circRNA3834	3.09637	up	0.0212684	KAT2B
circRNA2163	4.14143	up	0.0222465	P4HA2
circRNA3556	-18.3994	down	0.0226878	DCAF6
circRNA9249	19.0755	up	0.0230729	HECW1
circRNA8842	18.5119	up	0.0231345	BMS1
circRNA63	2.97865	up	0.0233846	SLC25A14
circRNA12143	18.4844	up	0.023765	SLC12A2
circRNA392	-1.13326	down	0.0243166	ACACA
circRNA6333	4.12899	up	0.0252481	ARHGEF26
circRNA5260	2.92826	up	0.0263464	HIF1A
circRNA2232	2.63634	up	0.0264528	G3BP1
circRNA1985	-2.40055	down	0.0268303	ENPEP
circRNA7074	3.03173	up	0.0276466	RALGAPA1
circRNA8546	18.7449	up	0.0279421	CTSO
circRNA14434	18.7625	up	0.0279968	PPP1R37
circRNA10414	18.7097	up	0.028262	SLC25A26
circRNA12040	18.2666	up	0.0287917	TMOD2
circRNA9078	18.0921	up	0.0288535	USP53
circRNA8949	18.2666	up	0.0289197	NUP153
circRNA3880	1.67004	up	0.0297882	ASPH
circRNA891	-3.5548	down	0.0316568	CYP2R1
circRNA4642	3.49648	up	0.0331988	PDZD2
circRNA3044	2.10896	up	0.0355036	CNTLN
circRNA937	3.34731	up	0.0355311	ENSOARG00000007994
circRNA10888	18.7793	up	0.0356845	HADHA
circRNA2279	-3.45037	down	0.0361115	ENSOARG00000018777
circRNA4982	3.21033	up	0.0373351	RUFY2
circRNA13991	18.6192	up	0.0376378	ACAP2
circRNA9535	18.2861	up	0.0389817	DENND4C
circRNA10098	18.2041	up	0.0390833	CDC42BPA
circRNA11140	18.327	up	0.0393029	PNKD
circRNA3774	3.3571	up	0.0396333	RYK
circRNA3892	2.06961	up	0.0402723	PREX2
circRNA2645	-17.8108	down	0.0403234	NPAS2
circRNA1995	-17.8108	down	0.0404016	PAPSS1
circRNA720	1.87414	up	0.040613	PITPNM2
circRNA1162	-17.8368	down	0.0409369	CHD2
circRNA13169	18.0698	up	0.0413709	EXOG
circRNA5519	-18.2352	down	0.0416048	ENSOARG00000017123
circRNA2250	3.17221	up	0.0420924	ZFYVE16
circRNA2986	1.45644	up	0.0435376	RNF38
circRNA294	-17.7842	down	0.0454308	ENSOARG00000009688
circRNA941	-18.2442	down	0.0460414	RNF169
circRNA11242	18.5225	up	0.0463789	JAM2
circRNA3910	-3.60604	down	0.0465752	ZFHX4
circRNA3605	-18.1966	down	0.0471114	IMPG2
circRNA2886	-2.29255	down	0.047472	HSDL2
circRNA2499	2.48783	up	0.0481905	ASAP2
circRNA8734	17.91	up	0.0481917	CCDC66
circRNA1072	-18.2068	down	0.0489464	ARL8B
circRNA1587	-2.12887	down	0.0496651	PIEZO2
circRNA2940	2.60319	up	0.0499632	KIF27

## Sheet: 30M vs 18M
Supplementary Table S3. The differentially expressed circRNA.
Accession	log2FoldChange	regulation	pvalue	hosting gene name
circRNA3206	20.9752	up	0.000439867	EPB41L5
circRNA1906	19.5745	up	0.000587417	KIAA0586
circRNA2546	5.00006	up	0.000631808	SPRED2
circRNA1281	20.4732	up	0.000743753	ENSOARG00000010366
circRNA1615	2.34815	up	0.00115315	TCF4
circRNA3472	4.95336	up	0.00150266	VAV3
circRNA8056	3.0183	up	0.00347372	FILIP1L
circRNA4886	4.07132	up	0.00394511	VPS37A
circRNA4560	2.58195	up	0.00422958	RAPGEF2
circRNA15078	19.74	up	0.00433028	VAV3
circRNA2196	-2.92252	down	0.00569457	AFF4
circRNA5028	4.06564	up	0.00592491	SLK
circRNA5441	18.7082	up	0.00683983	ARHGAP26
circRNA342	19.0508	up	0.00755338	RPS6KC1
circRNA4764	19.0363	up	0.00790615	ULK4
circRNA4723	-18.4561	down	0.00792647	PHKB
circRNA13339	18.8616	up	0.00807865	OSBPL1A
circRNA7834	-19.0433	down	0.0082526	IFT74
circRNA6285	-18.4681	down	0.008872	LRCH3
circRNA9252	-18.436	down	0.00888036	VPS41
circRNA7120	18.8782	up	0.010331	ACSM3
circRNA6461	18.8782	up	0.0103453	LRRCC1
circRNA6368	-18.4551	down	0.0106549	BRWD1
circRNA7047	18.7665	up	0.0115421	ENSOARG00000011951
circRNA2616	2.4547	up	0.0121989	RMDN2
circRNA6505	18.4934	up	0.0126867	FYN
circRNA4506	18.76	up	0.0129852	PSPC1
circRNA504	-18.9754	down	0.0133911	ABCA9
circRNA520	-2.94598	down	0.0137577	CEP112
circRNA13139	19.1075	up	0.0138649	PHKB
circRNA5519	-18.9083	down	0.0139887	ENSOARG00000017123
circRNA2085	2.01831	up	0.0140625	MTHFD2L
circRNA4714	-4.27925	down	0.0143946	HSD17B12
circRNA8824	-18.9045	down	0.0151216	ENSOARG00000002994
circRNA392	-1.60604	down	0.0163178	ACACA
circRNA4023	18.5149	up	0.0168984	LAMA4
circRNA11781	3.94775	up	0.016936	STAC
circRNA6362	18.5418	up	0.0176245	DNAJC13
circRNA2451	18.5418	up	0.0176455	ENSOARG00000005960
circRNA6418	3.021	up	0.017751	PREX2
circRNA522	-1.42967	down	0.0179853	CEP112
circRNA941	-18.903	down	0.0188743	RNF169
circRNA1502	-1.2367	down	0.0190789	GPAM
circRNA123	2.99279	up	0.0203632	MINDY3
circRNA3885	2.19566	up	0.0221328	CSPP1
circRNA4219	-18.199	down	0.0225095	TASP1
circRNA1083	-1.7367	down	0.0225644	ENSOARG00000009693
circRNA10345	-18.5505	down	0.0231977	SOX6
circRNA2723	-2.95678	down	0.0243102	PPHLN1
circRNA1237	-18.0162	down	0.0246987	PPP4R3A
circRNA4013	-3.49983	down	0.0247721	LAMA4
circRNA674	-1.88812	down	0.0257013	SLC10A7
circRNA11313	-18.5087	down	0.0259253	ACAD11
circRNA7173	18.4982	up	0.0274361	ENSOARG00000004278
circRNA6749	18.4253	up	0.0277541	RHOT1
circRNA5216	-18.204	down	0.0286254	TLN2
circRNA4175	3.09755	up	0.0287249	ATRX
circRNA1902	3.26548	up	0.0290156	ARID4A
circRNA14434	18.7625	up	0.0290961	PPP1R37
circRNA3570	2.85477	up	0.0300056	ADAMTS5
circRNA1683	-1.35117	down	0.0305138	SLC35B3
circRNA3354	18.0921	up	0.0305458	AGO3
circRNA9864	-17.8561	down	0.0308406	ADHFE1
circRNA8719	-17.8561	down	0.0308691	ANO10
circRNA299	3.2235	up	0.0313949	ENSOARG00000008656
circRNA3834	3.05324	up	0.0340003	KAT2B
circRNA6999	-18.3736	down	0.0351686	ARHGAP35
circRNA382	-2.07636	down	0.0354299	ACACA
circRNA1911	3.1881	up	0.0354369	DHRS7
circRNA785	18.8819	up	0.0355773	ERBIN
circRNA70	2.68785	up	0.0371951	PLS3
circRNA394	-2.22593	down	0.0372185	ACACA
circRNA1289	1.90157	up	0.0384316	NSD3
circRNA2743	18.0778	up	0.0385242	CPM
circRNA5416	18.2303	up	0.038805	SLC12A2
circRNA3221	-2.07219	down	0.0391415	HECW2
circRNA13991	18.6192	up	0.0401134	ACAP2
circRNA2453	-18.063	down	0.0420743	RBM33
circRNA7402	2.771	up	0.0428772	HERC3
circRNA13169	18.0698	up	0.0435997	EXOG
circRNA365	1.93406	up	0.0436616	ENSOARG00000010822
circRNA1913	-2.29802	down	0.0449746	DHRS7
circRNA311	18.3236	up	0.0462748	RFWD2
circRNA1970	18.3236	up	0.0463926	CASC4
circRNA10766	3.09243	up	0.0466647	GAK
circRNA3160	2.33397	up	0.0478409	BAZ2B
circRNA3457	18.4366	up	0.0483034	ARHGAP29
circRNA2614	17.91	up	0.0483666	RMDN2
circRNA3043	2.12473	up	0.0493129	CNTLN

## Sheet: 18M vs 6M
Supplementary Table S3. The differentially expressed circRNA.
Accession	log2FoldChange	regulation	pvalue	hosting gene name
circRNA1793	-19.8455	down	4.6482e-05	DENND4A
circRNA3206	-20.9795	down	0.000202798	EPB41L5
circRNA4947	-20.243	down	0.000628304	GTF2I
circRNA2451	-19.1138	down	0.000731364	ENSOARG00000005960
circRNA8808	18.9541	up	0.00118055	ADAM32
circRNA2013	-18.9049	down	0.00119287	ABCG2
circRNA9004	19.8501	up	0.00132222	ENSOARG00000019672
circRNA10888	19.5193	up	0.00247871	HADHA
circRNA1600	-18.8496	down	0.00295764	CTIF
circRNA9249	18.7697	up	0.0036705	HECW1
circRNA1671	-18.6161	down	0.00414767	CDKAL1
circRNA8278	19.2977	up	0.00542207	ARHGEF6
circRNA2616	-2.25272	down	0.0055529	RMDN2
circRNA3464	2.85355	up	0.00873363	DBT
circRNA8546	18.5849	up	0.00930897	CTSO
circRNA1700	1.92252	up	0.00935482	ENSOARG00000004148
circRNA9252	18.436	up	0.0124504	VPS41
circRNA3360	-18.5244	down	0.014002	SCMH1
circRNA2886	-18.8419	down	0.0140311	HSDL2
circRNA2733	3.94351	up	0.0148299	ABCD2
circRNA8824	18.9045	up	0.0158653	ENSOARG00000002994
circRNA520	3.07239	up	0.0172936	CEP112
circRNA570	-3.08663	down	0.0189105	RB1
circRNA8835	18.1871	up	0.0200533	SIPA1L2
circRNA8798	18.175	up	0.0224622	PCM1
circRNA9962	18.2003	up	0.0237321	SLC2A12
circRNA2490	-2.32109	down	0.0241506	RC3H2
circRNA1637	-18.1247	down	0.0245665	FKBP5
circRNA342	-18.5712	down	0.0283069	RPS6KC1
circRNA10345	18.5505	up	0.0289857	SOX6
circRNA3762	3.75103	up	0.0296834	STAG1
circRNA2144	-17.9818	down	0.0297	EPS15L1
circRNA9075	18.2146	up	0.030771	PDE5A
circRNA8989	18.0297	up	0.0313685	CLPX
circRNA3449	-2.46466	down	0.0314795	EVI5
circRNA11313	18.5087	up	0.0315044	ACAD11
circRNA6144	3.82934	up	0.0317896	TM2D1
circRNA8915	18.6049	up	0.0325407	PTPRM
circRNA6346	-4.05307	down	0.0327706	TFDP2
circRNA1196	-18.1242	down	0.0328168	TSPAN3
circRNA9050	18.0485	up	0.0357162	ARID4A
circRNA1985	-3.51643	down	0.0361859	ENPEP
circRNA2813	2.2157	up	0.0363016	SOX5
circRNA9037	18.4918	up	0.036681	TCF12
circRNA1697	-2.34478	down	0.0367292	ENSOARG00000002077
circRNA9535	17.9998	up	0.038307	DENND4C
circRNA9657	18.5916	up	0.0399001	ZFYVE9
circRNA7294	2.6969	up	0.0411318	HOMER1
circRNA175	-2.25329	down	0.041858	ATRN
circRNA4451	4.24169	up	0.0419768	CEP112
circRNA522	1.48218	up	0.0424067	CEP112
circRNA3358	-1.80643	down	0.0425998	RLF
circRNA5187	-18.4769	down	0.042807	PIAS1
circRNA9864	17.8561	up	0.0430633	ADHFE1
circRNA8738	17.8545	up	0.0430705	PBRM1
circRNA8719	17.8561	up	0.0431596	ANO10
circRNA2142	-17.8105	down	0.0433644	MYO9B
circRNA2381	-18.3641	down	0.0438504	PDE1C
circRNA3100	-18.3463	down	0.0440041	ITGAV
circRNA8400	18.3071	up	0.0456379	KDM5B
circRNA9954	17.8711	up	0.0463202	ORC3
circRNA9325	17.8711	up	0.0463654	PEX13
circRNA4714	3.45448	up	0.0475142	HSD17B12
circRNA9207	18.0589	up	0.0486975	CDK14
circRNA2778	-18.0047	down	0.048722	SLC41A2
circRNA3539	-2.71058	down	0.0493834	ATF6
