# Supplementary material for: MicroRNA and circular RNA profiling in the deposited fat tissue of Sunite sheep
Source: Front Vet Sci. 2022 Nov 4;9:954882. doi: 10.3389/fvets.2022.954882 (PMC9672515; doi:10.3389/fvets.2022.954882)
Supplement: Supplementary Table S4 — The highly expressed DE miRNA in tail fat. [file Table_4.XLSX]

## Sheet: Sheet1
Supplementary Table S4. The highly expressed DE miRNA in tail fat.
miRNA Name	6M(ave.norm value)	18M(ave.norm value)	30M(ave.norm value)
oar-let-7i	170997	228839	239132
oar-miR-27a_R-1	19027.6	26646.9	28814.3
oar-miR-23b_R+4_1	15563.4	17724.6	25246.9
oar-let-7b_R+1	115536	123988	138056
oar-miR-494-3p	4696.41	1951.68	1512.19
oar-miR-29a	20186.8	38751	41321.1
oar-miR-16b_R+3	12320.3	10129.5	13944.2
oar-miR-30a-3p_R+1	3725.49	5582.15	3305.19
oar-miR-23b_R+4_2	15563.4	17724.6	25246.9
oar-miR-379-5p_R-1	11002.4	6048.35	3767.75
oar-miR-411a-5p	5728.11	3640.18	2058.84
oar-miR-22-3p_R+1	125107	166870	156121
oar-miR-30b_R+1	7475.12	10512.2	10031.7
oar-miR-199a-3p	122581	149014	99411.4
oar-miR-30d_R+4	90453.3	80701.5	103808
oar-let-7c	15402.5	15678.1	18641.4
